# Supplementary material for: Defective Fe3GeTe2 monolayer as a promising electrocatalyst for spontaneous nitrogen reduction reaction
Source: Royal Society of Chemistry journal article supplement (doi:10.1039/d0ta10494a), 2021-01-01
Supplement: d0ta10494a1.pdf [file d0ta10494a1.pdf]

## Supporting Information

### Defective Fe<sub>3</sub>GeTe<sub>2</sub> Monolayer as a Promising Electrocatalyst for Spontaneous Nitrogen Reduction Reaction

Zuju Ma,<sup>1,\*</sup> Chengwei Xiao,<sup>2</sup> Zhitao Cui,<sup>2</sup> Wei Du,<sup>1</sup> Qiaohong Li,<sup>3</sup> Rongjian Sa,<sup>4,\*</sup> and  
Chenghua Sun<sup>5,6\*</sup>

<sup>1</sup>School of Environmental and Materials Engineering, Yantai University, Yantai, 264005, PR China

<sup>2</sup>School of Materials Science and Engineering, Anhui University of Technology, Maanshan 243002, China.

<sup>3</sup>State Key Laboratory of Structural Chemistry, Fujian Institute of Research on the Structure of Matter, Chinese Academy of Sciences, Fuzhou 350002, China

<sup>4</sup>Institute of Oceanography, Ocean College, Minjiang University, Fuzhou, 350108, China

<sup>5</sup>College of Chemical Engineering and Energy Technology, Dongguan University of Technology, Dongguan 523808, China

<sup>6</sup>Department of Chemistry and Biotechnology, Faculty of Science, Engineering & Technology, Swinburne University of Technology, Hawthorn, VIC 3122, Australia

---

\* Author to whom correspondence should be addressed.

Electronic mail: [zjma@outlook.com](mailto:zjma@outlook.com), [rjsa@mju.edu.cn](mailto:rjsa@mju.edu.cn), and [chenghuasun@swin.edu.au](mailto:chenghuasun@swin.edu.au)

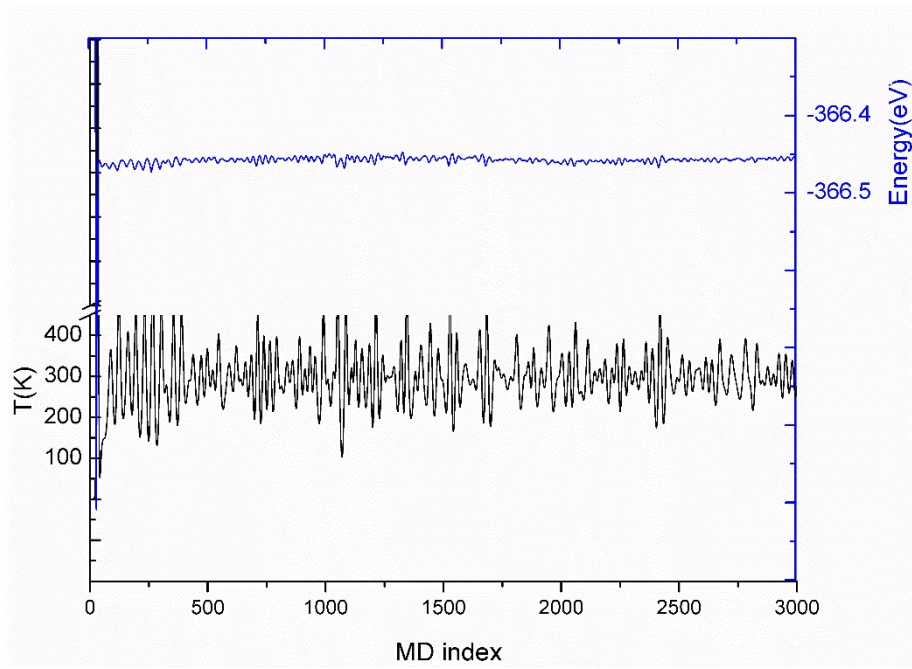

Fig. S1 The temperature and energy against the MD simulation time.

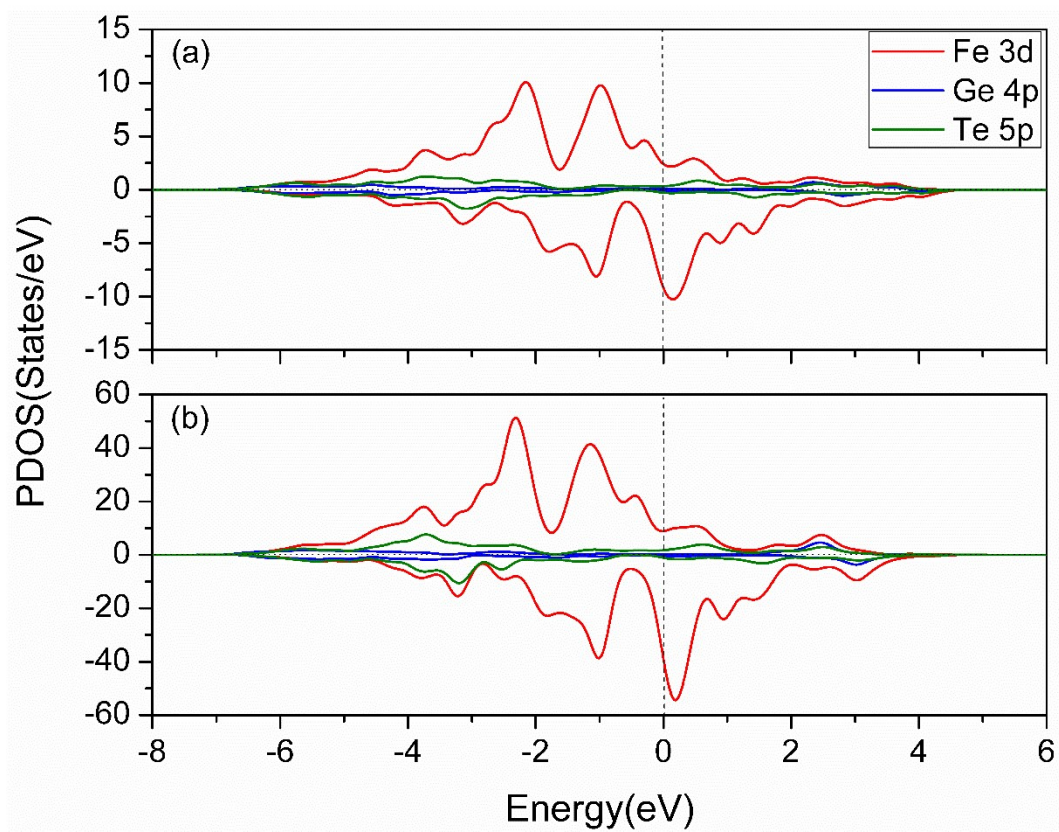

Fig. S2 Spin-polarized PDOS for the bulk Fe<sub>3</sub>GeTe<sub>2</sub> (a) and pristine Fe<sub>3</sub>GeTe<sub>2</sub> monolayer (b).

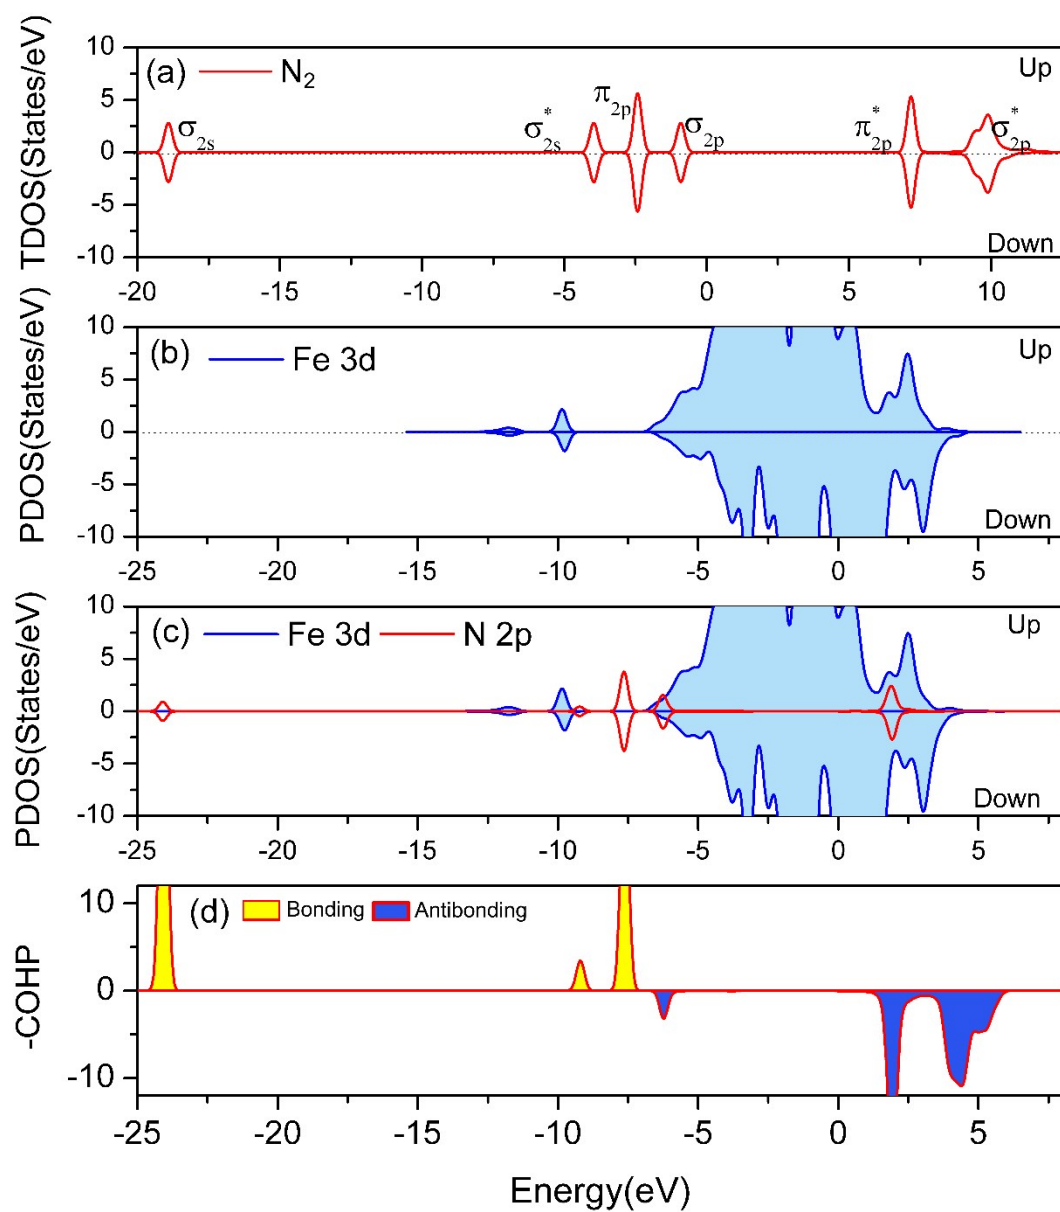

**Fig. S3** Molecular orbitals for free N<sub>2</sub> (a). Projected density of states of Fe 3d orbitals of pristine Fe<sub>3</sub>GeTe<sub>2</sub> monolayer (b), and the Fe 3d and N 2p orbitals of N<sub>2</sub> adsorbed pristine Fe<sub>3</sub>GeTe<sub>2</sub> (c). The crystal orbital Hamilton population of N<sub>2</sub> on the pristine Fe<sub>3</sub>GeTe<sub>2</sub> surface(d). The bonding and antibonding states in -COHP are depicted by yellow and blue, respectively.



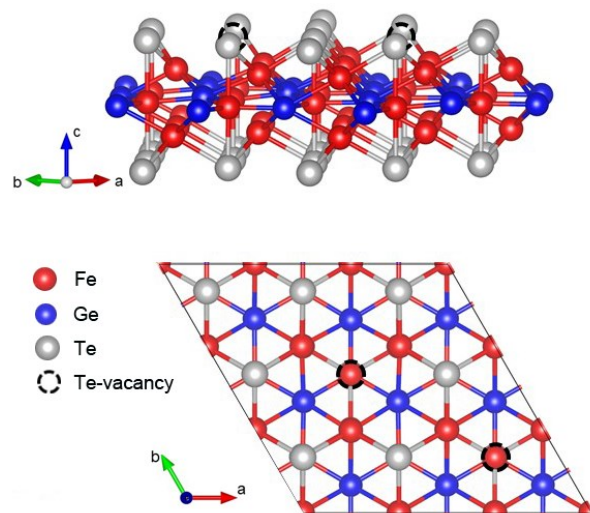

**Fig. S4** The side and top views of the defective  $\text{Fe}_3\text{GeTe}_2$  with double-Te vacancies.

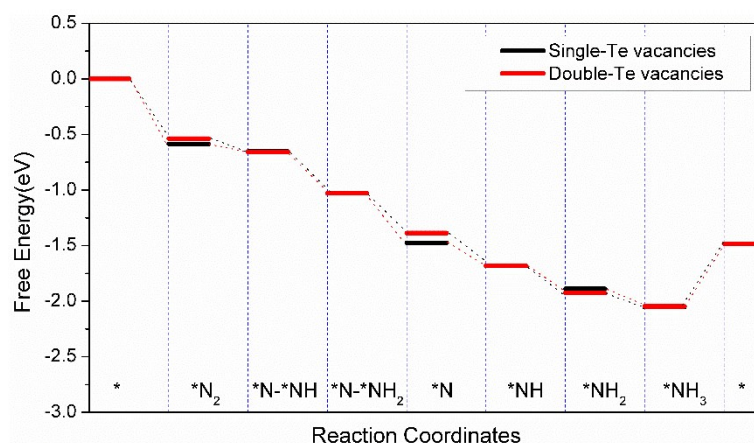

**Fig. S5** The NRR pathway on defect  $\text{Fe}_3\text{GeTe}_2$  monolayer with single- and double-Te vacancies.

**Table S1.** The formation energy of cation vacancy (Fe or Ge vacancy) and anion vacancy (Te vacancy) in  $\text{Fe}_3\text{GeTe}_2$  calculated by the following formula:  $E_f = E_{\text{defective}} - E_{\text{pure}} + \mu_{\text{vacancy}}$ , where  $E_{\text{defective}}$  and  $E_{\text{pure}}$  are the total energies of the defective  $\text{Fe}_3\text{GeTe}_2$  with one vacancy in a unit cell, and the pristine  $\text{Fe}_3\text{GeTe}_2$ , respectively.  $\mu_{\text{vacancy}}$  is the chemical potential of the Fe, Ge or Te atoms.

|                  | Fe <sub>1</sub> | Ge    | Te    |
|------------------|-----------------|-------|-------|
| $E_f(\text{eV})$ | 6.707           | 8.268 | 2.424 |

**Table S2.** The partial and integrated local magnetic moments in pristine and defective  $\text{Fe}_3\text{GeTe}_2$  monolayer in units of  $\mu_B$ .

|      | Pristine $\text{Fe}_3\text{GeTe}_2$ |       |       |        | Defective $\text{Fe}_3\text{GeTe}_2$ |        |       |        |
|------|-------------------------------------|-------|-------|--------|--------------------------------------|--------|-------|--------|
|      | s                                   | p     | d     | tot    | s                                    | p      | d     | tot    |
| Ge1  | -0.003                              | -0.06 | 0.01  | -0.053 | -0.002                               | -0.064 | 0.01  | -0.056 |
| Ge2  | -0.003                              | -0.06 | 0.01  | -0.053 | -0.003                               | -0.063 | 0.01  | -0.055 |
| Ge3  | -0.003                              | -0.06 | 0.01  | -0.053 | -0.002                               | -0.063 | 0.01  | -0.055 |
| Ge4  | -0.003                              | -0.06 | 0.01  | -0.053 | -0.003                               | -0.062 | 0.011 | -0.054 |
| Ge5  | -0.003                              | -0.06 | 0.01  | -0.053 | -0.004                               | -0.063 | 0.011 | -0.057 |
| Ge6  | -0.003                              | -0.06 | 0.01  | -0.053 | -0.002                               | -0.063 | 0.01  | -0.055 |
| Ge7  | -0.003                              | -0.06 | 0.01  | -0.053 | -0.002                               | -0.064 | 0.01  | -0.055 |
| Ge8  | -0.003                              | -0.06 | 0.01  | -0.053 | -0.004                               | -0.063 | 0.011 | -0.056 |
| Ge9  | -0.003                              | -0.06 | 0.01  | -0.053 | -0.002                               | -0.063 | 0.01  | -0.056 |
| Fe1  | 0.006                               | 0.026 | 1.812 | 1.843  | 0.006                                | 0.025  | 1.806 | 1.837  |
| Fe2  | 0.006                               | 0.026 | 1.811 | 1.843  | 0.005                                | 0.025  | 1.873 | 1.903  |
| Fe3  | -0.002                              | 0.002 | 0.992 | 0.993  | -0.002                               | 0.001  | 1.04  | 1.039  |
| Fe4  | 0.006                               | 0.026 | 1.812 | 1.844  | 0.006                                | 0.024  | 1.808 | 1.838  |
| Fe5  | 0.006                               | 0.026 | 1.811 | 1.843  | 0.006                                | 0.025  | 1.883 | 1.915  |
| Fe6  | -0.002                              | 0.002 | 0.992 | 0.993  | -0.002                               | 0.001  | 1.021 | 1.02   |
| Fe7  | 0.006                               | 0.026 | 1.812 | 1.844  | 0.006                                | 0.027  | 1.92  | 1.953  |
| Fe8  | 0.006                               | 0.026 | 1.812 | 1.843  | 0.006                                | 0.025  | 1.797 | 1.828  |
| Fe9  | -0.002                              | 0.002 | 0.992 | 0.993  | -0.002                               | 0.002  | 0.993 | 0.993  |
| Fe10 | 0.006                               | 0.026 | 1.812 | 1.844  | 0.006                                | 0.027  | 1.913 | 1.945  |
| Fe11 | 0.006                               | 0.026 | 1.812 | 1.843  | 0.006                                | 0.026  | 1.795 | 1.827  |
| Fe12 | -0.002                              | 0.002 | 0.992 | 0.993  | -0.002                               | 0.001  | 1.037 | 1.037  |
| Fe13 | 0.006                               | 0.026 | 1.812 | 1.844  | 0.006                                | 0.028  | 1.961 | 1.995  |
| Fe14 | 0.006                               | 0.026 | 1.812 | 1.843  | 0.009                                | 0.029  | 2.075 | 2.114  |
| Fe15 | -0.002                              | 0.002 | 0.992 | 0.993  | 0                                    | -0.001 | 1.369 | 1.368  |
| Fe16 | 0.006                               | 0.026 | 1.813 | 1.844  | 0.006                                | 0.027  | 1.922 | 1.955  |
| Fe17 | 0.006                               | 0.026 | 1.812 | 1.843  | 0.006                                | 0.025  | 1.796 | 1.827  |
| Fe18 | -0.002                              | 0.002 | 0.992 | 0.993  | -0.002                               | 0.001  | 1.029 | 1.029  |
| Fe19 | 0.006                               | 0.026 | 1.812 | 1.844  | 0.006                                | 0.025  | 1.805 | 1.836  |

---

|      |        |        |       |        |        |        |       |        |
|------|--------|--------|-------|--------|--------|--------|-------|--------|
| Fe20 | 0.006  | 0.026  | 1.811 | 1.843  | 0.005  | 0.025  | 1.875 | 1.906  |
| Fe21 | -0.002 | 0.002  | 0.992 | 0.992  | -0.001 | 0.003  | 0.966 | 0.967  |
| Fe22 | 0.006  | 0.026  | 1.812 | 1.844  | 0.006  | 0.028  | 1.965 | 1.999  |
| Fe23 | 0.006  | 0.026  | 1.812 | 1.843  | 0.01   | 0.029  | 2.074 | 2.114  |
| Fe24 | -0.002 | 0.002  | 0.992 | 0.993  | -0.002 | 0.001  | 1.025 | 1.024  |
| Fe25 | 0.006  | 0.026  | 1.812 | 1.844  | 0.006  | 0.028  | 1.959 | 1.993  |
| Fe26 | 0.006  | 0.026  | 1.812 | 1.843  | 0.008  | 0.028  | 2.078 | 2.114  |
| Fe27 | -0.002 | 0.002  | 0.992 | 0.993  | -0.002 | 0.001  | 1.036 | 1.035  |
| Te1  | 0.004  | -0.039 | 0.003 | -0.031 | 0.005  | -0.042 | 0.003 | -0.034 |
| Te2  | 0.004  | -0.039 | 0.003 | -0.031 | 0.003  | -0.043 | 0.003 | -0.036 |
| Te3  | 0.004  | -0.039 | 0.003 | -0.031 | 0.005  | -0.043 | 0.003 | -0.035 |
| Te4  | 0.004  | -0.039 | 0.003 | -0.031 | 0.004  | -0.033 | 0.003 | -0.026 |
| Te5  | 0.004  | -0.039 | 0.003 | -0.031 | 0.005  | -0.04  | 0.003 | -0.032 |
| Te6  | 0.004  | -0.039 | 0.003 | -0.031 | 0.004  | -0.037 | 0.003 | -0.03  |
| Te7  | 0.004  | -0.039 | 0.003 | -0.031 | 0.005  | -0.043 | 0.003 | -0.035 |
| Te8  | 0.004  | -0.039 | 0.003 | -0.031 | 0.004  | -0.04  | 0.003 | -0.033 |
| Te9  | 0.004  | -0.039 | 0.003 | -0.031 | 0.005  | -0.04  | 0.004 | -0.031 |
| Te10 | 0.004  | -0.039 | 0.003 | -0.031 |        |        |       |        |
| Te11 | 0.004  | -0.039 | 0.003 | -0.031 | 0.005  | -0.042 | 0.003 | -0.035 |
| Te12 | 0.004  | -0.039 | 0.003 | -0.031 | 0.004  | -0.04  | 0.003 | -0.034 |
| Te13 | 0.004  | -0.039 | 0.003 | -0.031 | 0.005  | -0.04  | 0.003 | -0.033 |
| Te14 | 0.004  | -0.039 | 0.003 | -0.031 | 0.005  | -0.036 | 0.003 | -0.029 |
| Te15 | 0.004  | -0.039 | 0.003 | -0.031 | 0.005  | -0.043 | 0.003 | -0.035 |
| Te16 | 0.004  | -0.039 | 0.003 | -0.031 | 0.004  | -0.033 | 0.003 | -0.025 |
| Te17 | 0.004  | -0.039 | 0.003 | -0.031 | 0.005  | -0.041 | 0.003 | -0.034 |
| Te18 | 0.004  | -0.039 | 0.003 | -0.031 | 0.003  | -0.043 | 0.003 | -0.037 |

---
